# Supplementary material for: A splicing isoform of TEAD4 attenuates the Hippo–YAP signalling to inhibit tumour proliferation
Source: PubMed Central journal article supplement (PMC4909989; doi:10.1038/ncomms11840), 2016-06-13
Supplement: ncomms11840-s1.pdf [file ncomms11840-s1.pdf]

**Supplemental Material for**

**A splicing isoform of TEAD4 attenuates Hippo-YAP signaling to inhibit tumor proliferation**

Yangfan Qi, Jing Yu, Wei Han, Xiaojuan Fan, Haili Qian, Huanhuan Wei, Yi-hsuan S. Tsai, Jinyao Zhao, Wenjing Zhang, Quentin Liu, Songshu Meng, Yang Wang and Zefeng Wang

Supplementary Figure 1 to 5 and legends

Supplementary Table 1

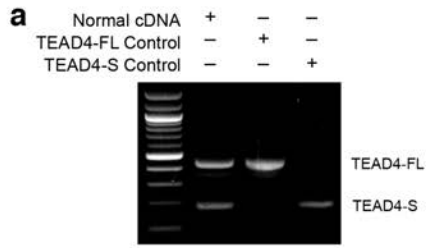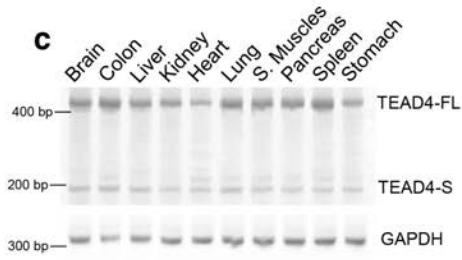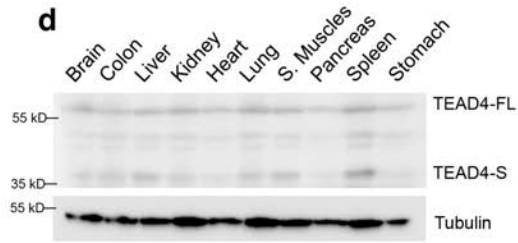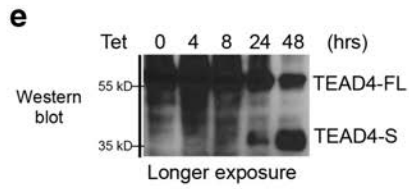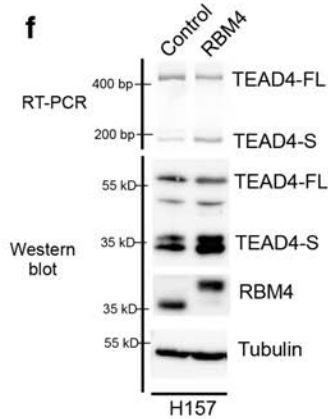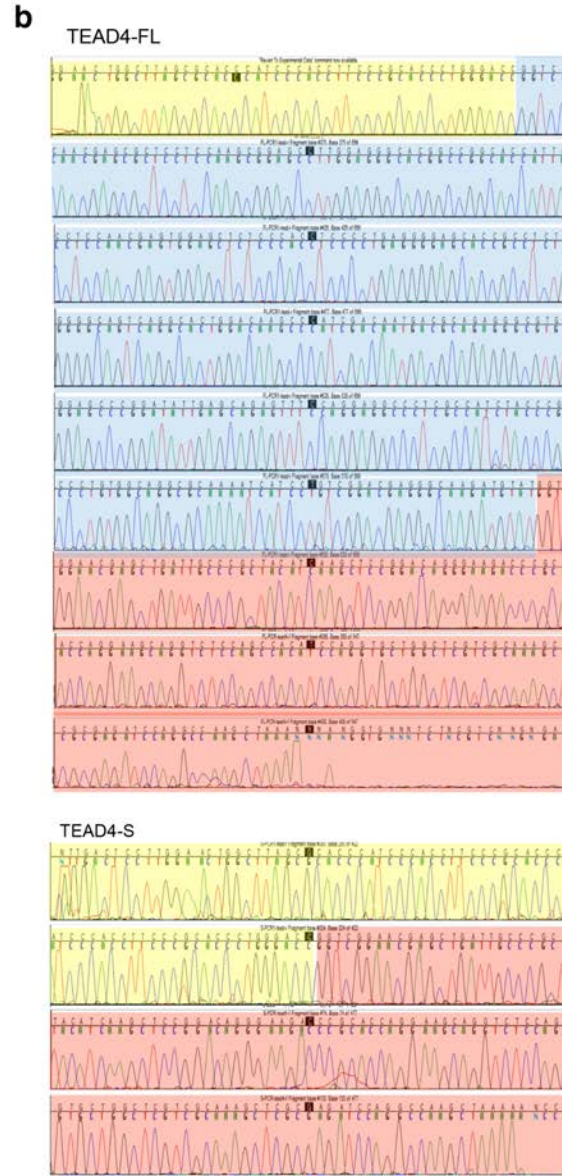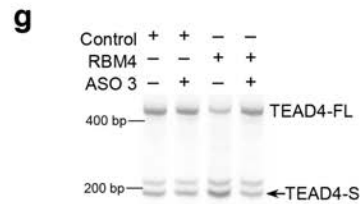

**Supplementary Figure 1. A novel splicing isoform of TEAD4 is regulated by RBM4.**

(a) Tead4 primers were designed to examine both TEAD4-FL and TEAD4-S products simultaneously. cDNAs from H157 cells were used as templates to amplify the two isoforms. The upper and lower products (lane 1) was cut from the gel and purified. The purified PCR products were used as templates to do a second PCR. The resulting PCR products (lane 2 and 3) were purified and sequenced. (b) The chromatograph of the sequenced TEAD4 PCR products. The yellow sequences indicate part of exon 2 of TEAD4, the blue sequences indicate the entire exon 3 of TEAD4, and the red sequences indicate part of exon 4 of TEAD4. (c-d) The expression levels of two TEAD4 splicing isoforms in different human tissues. A panel of human tissue cDNAs were used as templates to amplify TEAD4 isoforms, and the PCR products were run on a 10% TBE-PAGE gel to separate. The representative gel figure was shown in (c). A panel of human tissue proteins were applied for a western blot assay. The two isoforms of TEAD4 were blotted with anti-TEAD4 antibody as shown in (d). (e) 293 cells expressing RBM4 upon tetracycline induction were collected at different time points after induction to determine the expression levels of TEAD4-FL and TEAD4-S (longer exposure). (f) RBM4 regulates the splicing of TEAD4 in H157 cells. The cells were stably transfected with RBM4 or vector control and the splicing of TEAD4 was examined by RT-PCR. The representative gels were shown. (g) The antisense oligo that masks RBM4 binding site was co-transfected with the RBM4 expression vector or control vector into A549 cells, and the splicing of TEAD4 was determined by RT-PCR.

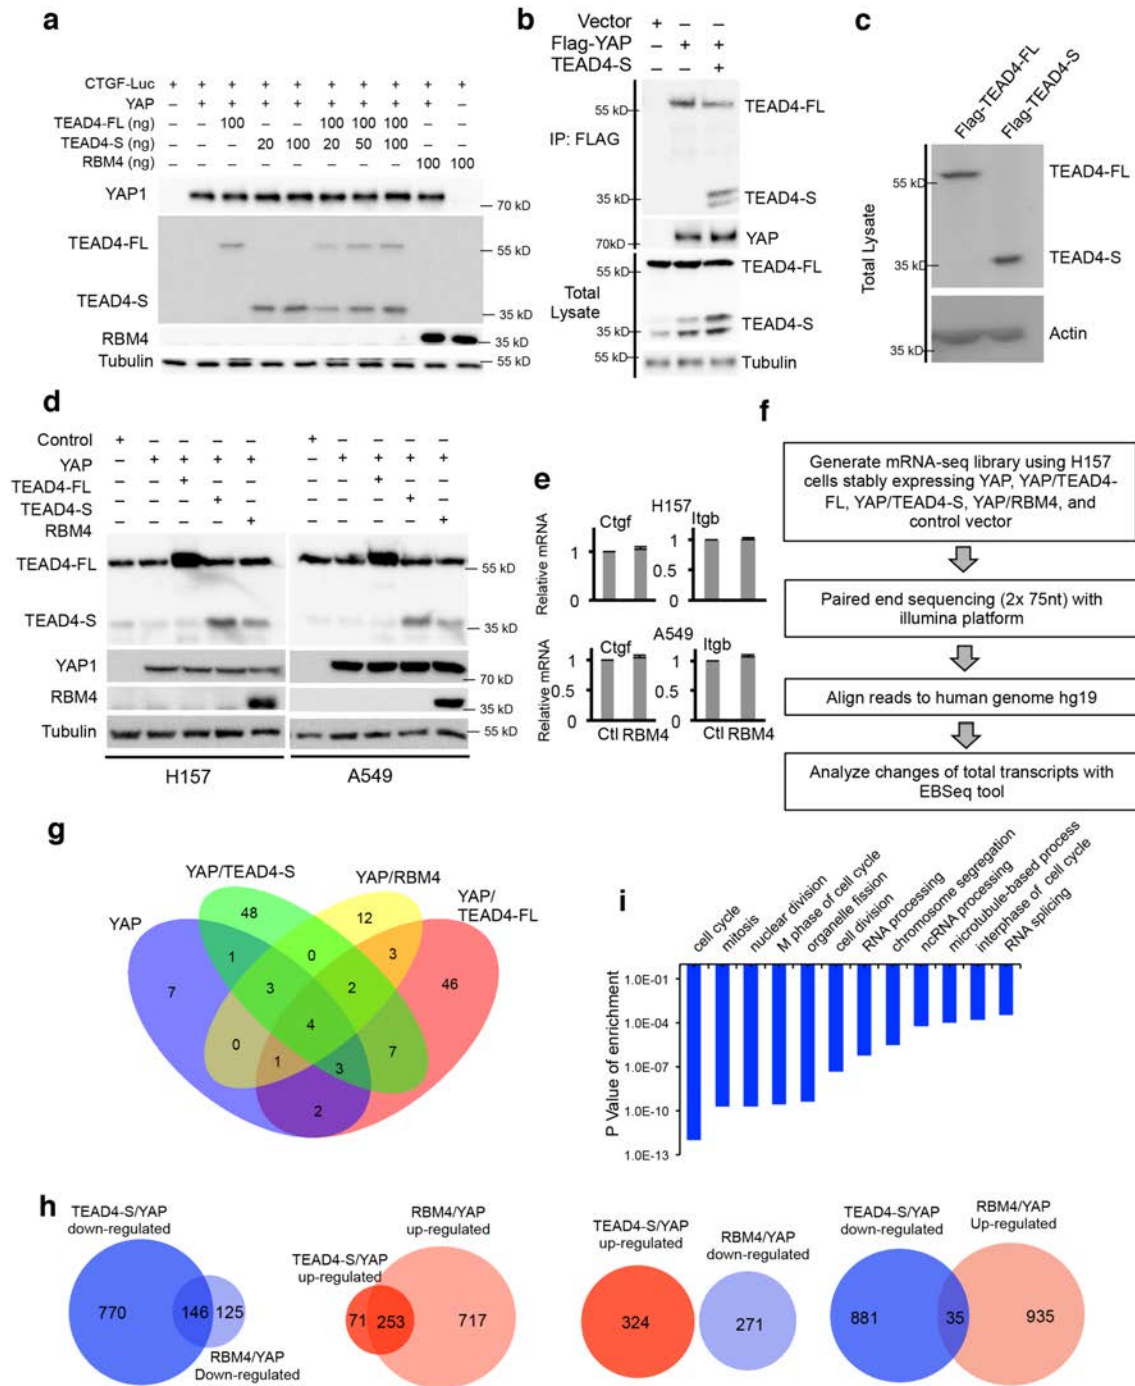

**Supplementary Figure 2. TEAD4-S isoform antagonizes full length TEAD4, repressing YAP signaling.** (a) TEAD4-FL, TEAD-S, or RBM4 were co-transfected with CTGF luciferase reporter in the presence or absence of YAP into 293T cells. The expression levels of these proteins were determined by western blot with anti-TEAD4,

anti-YAP, anti-RBM4 antibodies. **(b)** 293T cells were co-transfected with control, Flag-YAP and /or untagged TEAD4-S vectors. Proteins were extracted from the transfected cells after 72 hours later. The purified proteins were used for immunoprecipitation assay with anti-Flag antibody. The interaction between Flag-YAP and endogenous TEAD4-FL was examined. The expression of TEAD4-FL and TEAD4-S were determined with anti-TEAD4 antibody using the total lysate. **(c)** The aliquots of the same set of samples for ChIP (in figure 2d) were used for a western blot to examine the expression levels of TEAD4. **(d)** Proteins from the same set of samples for realtime RT-PCR (in figure 2e-2f) were used for a western blot to examine the expression of TEAD4, YAP1, and RBM4 with anti-TEAD4, anti-YAP, and anti-RBM4 antibodies. **(e)** The expression levels of CTGF and ITGB were examined by realtime RT-PCR in RBM4 overexpressed or control H157 and A549 cells. The mean  $\pm$  SD of relative mRNA levels from triplicate experiments were plotted. **(f)** The flow chart of the RNA-seq experiment. **(g)** The overlappings between significantly affected genes from the RNA-seq data of cells with co-expression of YAP with TEAD4-FL or TEAD4-S were shown. The data suggested that cells with co-expression of YAP with TEAD4-FL or TEAD4-S displayed limited overlapping between significantly affected genes. **(h)** The overlappings of genes up-regulated or down-regulated upon YAP/TEAD4-S expression with those altered in YAP/RBM4 in RNA-seq data were analyzed. They are significantly overlapped. ( $P < 2.2 \times 10^{-16}$ ) **(i)** The gene ontology analysis of the overlapped genes from the RNA-seq data.

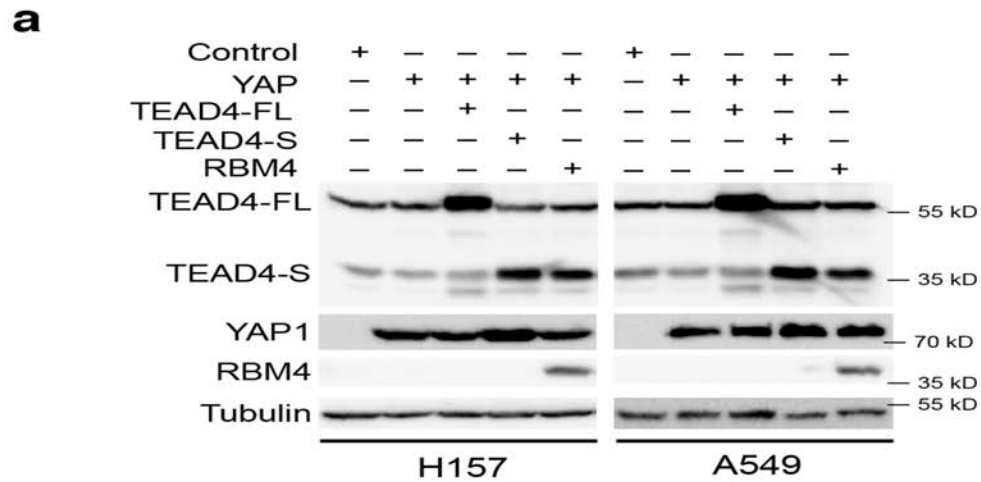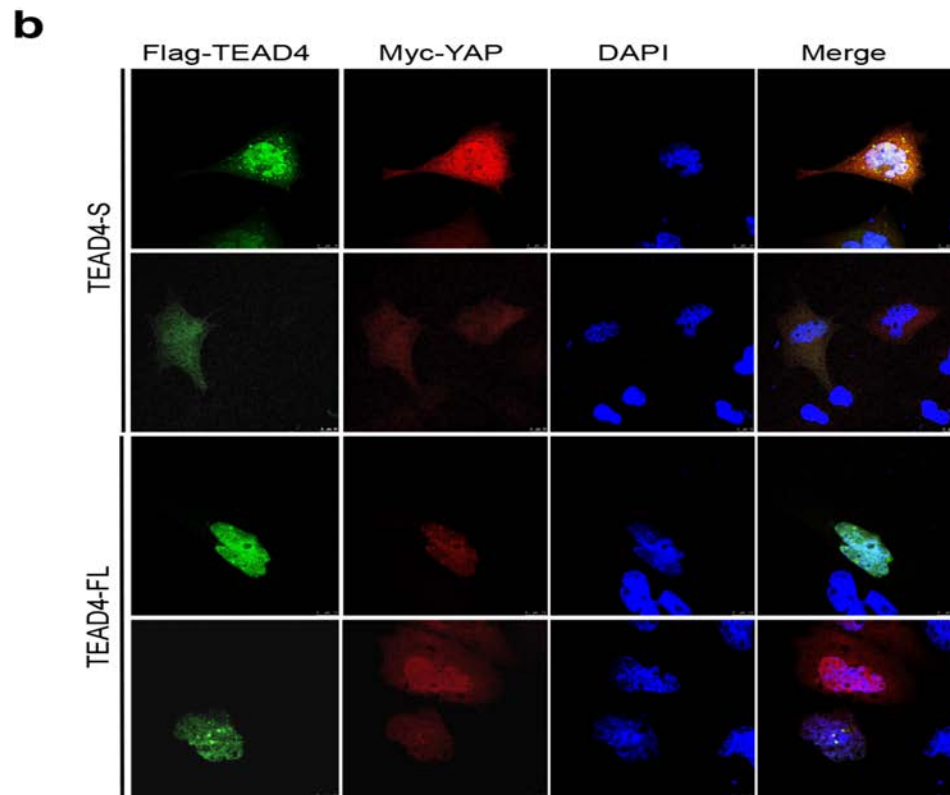

**Supplementary Figure 3. (a)** H157 and A549 cells that stably expressing YAP alone or co-expressing YAP with TEAD4-FL, TEAD4-S or RBM4 were collected. The protein expression levels of YAP, TEAD4-FL, TEAD4-S, and RBM4 were determined with western blot using anti TEAD4, YAP1, and RBM4 antibodies. **(b)** The cells were co-

transfected with myc-YAP and Flag-tagged TEAD4-FL or TEAD4-S. Then the cells were stained with anti-flag and anti-myc antibodies and the localizations of YAP (red) and TEAD4 (green) were observed under an immunofluorescence microscope.

**a**

| Cancer types | No. of Normal | No. of Tumor |
|--------------|---------------|--------------|
| BLCA         | 23            | 214          |
| BRCA         | 110           | 991          |
| COAD         | 27            | 423          |
| HNSC         | 46            | 428          |
| KIRC         | 76            | 509          |
| KIRP         | 34            | 164          |
| LIHC         | 54            | 150          |
| LUAD         | 61            | 477          |
| PRAD         | 49            | 259          |
| THCA         | 62            | 495          |
| UCEC         | 32            | 491          |

**b**

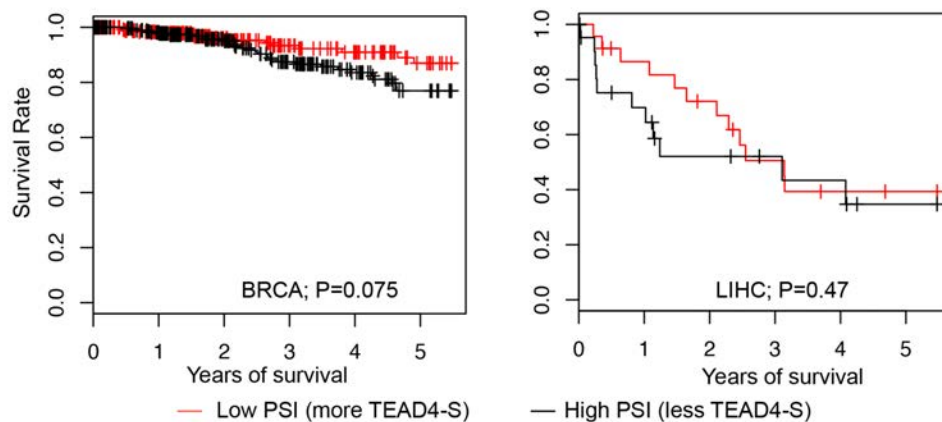

**Supplementary Figure 4. TEAD4-S is positively correlated to cancer patients' survival. (a)** The cancer types, numbers of the normal and tumor tissues of the TCGA dataset obtained for analyzing the survival were shown. **(b)** The correlations of TEAD4-S with breast cancer and liver cancer patient survivals were demonstrated.





**Supplementary Table 1. Lists of oligonucleotide used in this study**

| Primer # | Name                 | Sequence                                                 | Notes                                                                                        |
|----------|----------------------|----------------------------------------------------------|----------------------------------------------------------------------------------------------|
| 1        | TEAD4-F              | GGACTCCTTGGAAGCTGGCTTA                                   | The primer pair used for testing                                                             |
| 2        | TEAD4-R              | TTTAGCTTGGCCTGGATCTC                                     | TEAD4                                                                                        |
| 3        | Tead4 Exon 2 fwd     | cac GCTAGC AACGATCGCCGCGGCCGGAA                          |                                                                                              |
| 4        | Tead4 intron 2 rev   | AAATTAGCCAGGTGTGGGGGCTCAAGTGCCT                          |                                                                                              |
| 5        | Tead4 intron 2-3 fwd | AGGCACTTGAGGCCCC CACACCTGGCTAATTT                        | Primers used for cloning TEAD4 exon 2 to 4 into pCDNA3 vector                                |
| 6        | Tead4 intron 3 rev   | GGGCATGGGGGTGCATGCCTTGCAGAGCAGG                          |                                                                                              |
| 7        | Tead4 intron 3-4 fwd | CCTGCTCTGCAAGGCATGCACCCCCATGCC                           |                                                                                              |
| 8        | Tead4 exon 4 rev     | CAC GCGGCCGC CTGCTTCCTGGTGCGGGTCT                        |                                                                                              |
| 9        | TEAD4-mut1-f         | GGAGCCTTGGAGGGCACttataCACCATTACCTCC AAC                  | The primer pair used for mutating the RBM4 binding site in TEAD4                             |
| 10       | TEAD4-mut1-r         | GTTGGAGGTAATGGTGtataaGTGCCCTCCAAGG CTCC                  | reporter                                                                                     |
| 11       | TEAD4-mut2-f         | GGAGCCTTGGAGGGCAgtaacgCACCATTACCTC CAAC                  | The primer pair used for rescuing the RBM4 binding site with another motif in TEAD4 reporter |
| 12       | TEAD4-mut2-r         | GTTGGAGGTAATGGTGcgttacTGCCCTCCAAGGC TCC                  |                                                                                              |
| 13       | TEAD4 RIP test fwd   | CCATTACCTCCAACGAGTGG                                     | The primer pair used for testing TEAD4 in RIP assay                                          |
| 14       | TEAD4 RIP test rev   | CTCGTCCGACAGGATGATTT                                     |                                                                                              |
| 15       | CTGF-fwd             | CCGTACTCCAAAATCTCCA                                      | The primer pair used for testing CTGF with RT-PCR                                            |
| 16       | CTGF-rev             | GTAATGGCAGGCACAGGTCT                                     |                                                                                              |
| 17       | ITGB2-fwd            | TTCTGCAGCAATGGAGTGAC                                     | The primer pair used for testing ITGB2 with RT-PCR                                           |
| 18       | ITGB2-rev            | ACTGCTCCTGGATGCACTCT                                     |                                                                                              |
| 19       | Pum-F1               | CACGGATCCTCCCCCAAGAAAAAGAGG AAGGTATCTAGAGGCCGAGCCGCTTTTG | Encodes NLS between BamHI and XbaI sites                                                     |
| 20       | Pum-R1               | GTGGTCGACTTACCCTAAGTCAACACC                              | Encodes a stop codon and SalI site                                                           |
